# Supplementary material for: Comparative Genomic Analyses of Virulence and Antimicrobial Resistance in Citrobacter werkmanii, an Emerging Opportunistic Pathogen
Source: MDPI journal article supplement (doi:10.3390/microorganisms11082114), 2023-08-19
Supplement: s1 [file s1]

**Table S1:** List of *Citrobacter* reference strains used in the present study.

| <i>Citrobacter</i> species       | Strain <sup>1</sup>       | Other strain designations                                  | GenBank accession number |
|----------------------------------|---------------------------|------------------------------------------------------------|--------------------------|
| <i>Citrobacter amalonaticus</i>  | NCTC10805 <sup>T</sup>    | CCUG 4860, CECT 863, DSM 4593, ATCC 25405, CIP 82.89       | UFVN01000003.1           |
|                                  | FDAARGOS_165              |                                                            | NZ_CP014070              |
| <i>Citrobacter braakii</i>       | ATCC 51113 <sup>T</sup>   | DSM 17596, CCUG 30792, CDC 80-58, CIP 104554               | NAEW01000001.1           |
|                                  | MiY-A                     |                                                            | NZ_CP045771              |
| <i>Citrobacter cronae</i>        | Tue2-1 <sup>T</sup>       |                                                            | VOSQ00000000             |
|                                  | Colony478                 |                                                            | NZ_CP069763              |
| <i>Citrobacter europaeus</i>     | 97/79 <sup>T</sup>        | DSM 103031, CIP 106467                                     | GCA_900079995            |
|                                  | 67A                       |                                                            | PQSZ01000000             |
| <i>Citrobacter farmeri</i>       | GTC 1319                  |                                                            | NZ_BBMX00000000.1        |
|                                  | CF_355                    |                                                            | NZ_RHWV01000000          |
| <i>Citrobacter freundii</i>      | ATCC 8090 <sup>T</sup>    | CIP 57.32; DSM 30039; NCTC 9750; NBRC 12681                | NZ_JMTA01000001.1        |
|                                  | FDAARGOS_549              |                                                            | NZ_CP033744              |
|                                  | UMH13                     |                                                            | CP024683.1               |
| <i>Citrobacter gillienii</i>     | CIP 106783 <sup>T</sup>   | ATCC 51117; CCUG 30796; DSM 13694; CDC 4693-86             | ERS574813                |
|                                  | UMG736                    |                                                            | NZ_SUQN01000000          |
| <i>Citrobacter koseri</i>        | NCTC10786 <sup>T</sup>    | ATCC 27028; CIP 82.87; DSM 4595; CCM 2537; JCM 1658        | UAVY00000000             |
|                                  | ATCC BAA-895              | 4225-83                                                    | CP000822.1               |
|                                  | FDAARGOS_530              |                                                            | CP033780                 |
| <i>Citrobacter murlinae</i>      | ATCC 51118 <sup>T</sup>   | DSM 13695; CCUG 30797; CIP 104556                          | ERS574814                |
|                                  | P080C CL                  |                                                            | GCF_004801125.1          |
| <i>Citrobacter pasteurii</i>     | CIP 55.13 <sup>T</sup>    | BA18; DSM 28879                                            | CDHL00000000             |
|                                  | UMH17                     |                                                            | CP024676                 |
| <i>Citrobacter portucalensis</i> | A60 <sup>T</sup>          | DSM 104542; CECT 9236                                      | NZ_MVFX01000001.1        |
|                                  | FDAARGOS_617              |                                                            | NZ_CP044098              |
| <i>Citrobacter rodentium</i>     | NBRC 105723 <sup>T</sup>  | DSM 16636; CIP 104675; ATCC 51116                          | NZ_BBNA01000001.1        |
|                                  | ICC168                    |                                                            | FN543502.1               |
| <i>Citrobacter sedlakii</i>      | NBRC 105722 <sup>T</sup>  | ATCC 51115; CCUG 30794; CIP 105037; DSM 17674              | NZ_BBNB01000001.1        |
|                                  | 3347689II                 |                                                            | NZ_CP071070.1            |
| <i>Citrobacter telaviviensis</i> | 6105 <sup>T</sup>         | NMI7904_11                                                 | CP045205.1               |
| <i>Citrobacter tructae</i>       | SNU WT2 <sup>T</sup>      |                                                            | NZ_CP038469              |
| <i>Citrobacter werkmanii</i>     | FDAARGOS_364 <sup>T</sup> | ATCC 51114; CIP 104555; CCUG 30793; DSM 17579, NBRC 105721 | GCA_002386385.1          |
|                                  | BF-6                      |                                                            | GCA_002025225.1          |
|                                  | RS189                     |                                                            | GCA_015958985.1          |
|                                  | CB00044                   |                                                            | GCA_016505055.1          |
| <i>Citrobacter youngae</i>       | CCUG 30791 <sup>T</sup>   | CIP 105016; ATCC 29935; DSM 17578; NCTC 13709              | NZ_RPOI01000016.1        |
|                                  | NCTC13708                 | CIP 55.18                                                  | UFWE00000000             |

<sup>1</sup> The superscript "T" indicates a *Citrobacter* type strain.

**Table S2.** Percentage of the average nucleotide identity for the *Citrobacter* strains examined in the present study.

| <i>Citrobacter</i> species <sup>1</sup>                | <i>Citrobacter werkmanii</i> LANIIA-032 | <i>Citrobacter werkmanii</i> FDAARGOS_364 <sup>T</sup> | <i>Citrobacter freundii</i> ATCC 8090 <sup>T</sup> | <i>Citrobacter youngae</i> CCUG 30791 <sup>T</sup> | <i>Citrobacter pasteurii</i> CIP 55.13 <sup>T</sup> | <i>Citrobacter braakii</i> ATCC 51113 <sup>T</sup> | <i>Citrobacter europaeus</i> 97/79 <sup>T</sup> | <i>Citrobacter portucalensis</i> A60 <sup>T</sup> | <i>Citrobacter tructae</i> SNU WT2 <sup>T</sup> | <i>Citrobacter cronae</i> Tue2-1 <sup>T</sup> |
|--------------------------------------------------------|-----------------------------------------|--------------------------------------------------------|----------------------------------------------------|----------------------------------------------------|-----------------------------------------------------|----------------------------------------------------|-------------------------------------------------|---------------------------------------------------|-------------------------------------------------|-----------------------------------------------|
| <i>Citrobacter tructae</i> SNU WT2 <sup>T</sup>        |                                         |                                                        |                                                    |                                                    |                                                     |                                                    |                                                 |                                                   |                                                 | 66.6                                          |
| <i>Citrobacter portucalensis</i> A60 <sup>T</sup>      |                                         |                                                        |                                                    |                                                    |                                                     |                                                    |                                                 |                                                   | 68.3                                            | 71.1                                          |
| <i>Citrobacter europaeus</i> 97/79 <sup>T</sup>        |                                         |                                                        |                                                    |                                                    |                                                     |                                                    |                                                 | 75.8                                              | 67.5                                            | 70.2                                          |
| <i>Citrobacter braakii</i> ATCC 51113 <sup>T</sup>     |                                         |                                                        |                                                    |                                                    |                                                     |                                                    | 70.3                                            | 69.7                                              | 65.6                                            | 67.0                                          |
| <i>Citrobacter pasteurii</i> CIP 55.13 <sup>T</sup>    |                                         |                                                        |                                                    |                                                    |                                                     | 64.4                                               | 69.3                                            | 71.1                                              | 67.0                                            | 66.6                                          |
| <i>Citrobacter youngae</i> CCUG 30791 <sup>T</sup>     |                                         |                                                        |                                                    |                                                    | 80.4                                                | 66.7                                               | 70.9                                            | 71.9                                              | 68.2                                            | 69.1                                          |
| <i>Citrobacter freundii</i> ATCC 8090 <sup>T</sup>     |                                         |                                                        |                                                    | 74.6                                               | 71.6                                                | 70.3                                               | 74.4                                            | 78.4                                              | 70.0                                            | 71.5                                          |
| <i>Citrobacter werkmanii</i> FDAARGOS_364 <sup>T</sup> |                                         |                                                        | 74.6                                               | 70.2                                               | 67.8                                                | 69.9                                               | 73.6                                            | 73.7                                              | 69.0                                            | 79.6                                          |
| <i>Citrobacter werkmanii</i> LANIIA-032                |                                         | 91.5                                                   | 74.2                                               | 70.2                                               | 68.0                                                | 69.3                                               | 73.3                                            | 74.3                                              | 68.7                                            | 79.3                                          |
| <i>Citrobacter werkmanii</i> LANIIA-031                | 91.4                                    | 91.1                                                   | 73.9                                               | 70.5                                               | 68.3                                                | 69.0                                               | 73.3                                            | 73.8                                              | 68.6                                            | 79.2                                          |

<sup>1</sup> The superscript "T" indicates a *Citrobacter* type strain.
